# Supplementary material
Source: MDPI journal article supplement (https://www.mdpi.com/2673-4133/5/2/18)
Supplement: s1 [file s1]

**Table S1:** Ethogram used for multifocal All Occurrence data collection.

|                               |                      |                                                                                                                                                                                                                                                                                                                                                                                                                                                                                                                                                                                                                                                                                                                                                                                                                                                                                                                                                                                                                                                                                                                                                                                                                                                                                                                                                                                                                                                                                                                                                                                             |
|-------------------------------|----------------------|---------------------------------------------------------------------------------------------------------------------------------------------------------------------------------------------------------------------------------------------------------------------------------------------------------------------------------------------------------------------------------------------------------------------------------------------------------------------------------------------------------------------------------------------------------------------------------------------------------------------------------------------------------------------------------------------------------------------------------------------------------------------------------------------------------------------------------------------------------------------------------------------------------------------------------------------------------------------------------------------------------------------------------------------------------------------------------------------------------------------------------------------------------------------------------------------------------------------------------------------------------------------------------------------------------------------------------------------------------------------------------------------------------------------------------------------------------------------------------------------------------------------------------------------------------------------------------------------|
| <b>Agonistic behaviors</b>    |                      | <p><b>Display:</b> An exhibition of force may include vocalizations (such as pant-hoot), piloerection, chest-beating, slapping, hitting the ground with hands or feet, and running at high speed in an aggressive context. <b>Aggression:</b> Displaying behavior that includes throwing objects and/or spitting at another individual. <b>Submission:</b> The individual displays signs of fear in response to another individual's aggression, often marked by submissive behaviors. These behaviors can include the presentation of vulnerable body parts in an attempt to appeal or avoid the aggressive individual, such as presenting genitals, extending limbs, covering the mouth, fleeing, or avoiding. This fear response is typically accompanied by a fearful facial expression and vocalizations, such as shouting, screaming, crying, or pant-grunting.</p>                                                                                                                                                                                                                                                                                                                                                                                                                                                                                                                                                                                                                                                                                                                   |
| <b>Affiliative behaviors</b>  |                      | <p>Includes the following behaviors: <b>Mutual gaze:</b> where two individuals stare at each other for at least 5 seconds; and <b>Greeting:</b> where two individuals look at each other by moving their heads up and down, which may include vocalizations such as grunting. Includes: <b>Follow:</b> Synchronized movement involving one individual following the trajectory of another individual, either from the side or from behind; <b>Social play:</b> Playful behavior between two or more individuals, occasionally accompanied by playful indicators (e.g., play faces, laughter, galloping, and pirouettes). This may involve activities such as picking, grabbing limbs or objects, tickling, muzzling, wrestling, and friendly grabbing (gentle or rough). These interactions do not require permanent physical contact. It also encompasses incitement to play; <b>Socio sexual:</b> Interaction or pursuit of sexual interaction between two individuals, encompassing behaviors such as inciting copulation, copulation, attempted copulation, genital presentation, and other behaviors directed toward the genitals of another individual, such as genital inspection; <b>Request:</b> The search for interaction between two individuals in a non-sexual or non-agonistic context. Includes: <b>Grooming:</b> Body-cleaning behavior from one individual to another, performed with the upper extremities and/or with the mouth; <b>Embrace:</b> An individual surrounds or attempts to surround one or both arms with some part of the body of another individual.</p> |
| <b>Self-directed behavior</b> | <b>Self-directed</b> | <p>Includes the following actions: <b>Yawn:</b> Opening the mouth widely, exposing the teeth; <b>Scratch:</b> Raking hair or skin with nails, primarily involving movements of the hand or fingers; <b>Bounce:</b> Swinging from side to side repeatedly.</p>                                                                                                                                                                                                                                                                                                                                                                                                                                                                                                                                                                                                                                                                                                                                                                                                                                                                                                                                                                                                                                                                                                                                                                                                                                                                                                                               |
|                               | <b>Abnormal</b>      | <p>Includes: <b>Rocking:</b> sitting rocking repeatedly; <b>Overgrooming:</b> grooming oneself in a hairless area; <b>Drink urine;</b> <b>Manipulate faeces;</b> <b>Coprophagy;</b> Pacing: traveling the same route over and over again without a clear objective; <b>Poke ear:</b> inserting a finger/object into the ear; <b>Poke anus:</b> inserting a finger/object into the anus; <b>Pluck hair;</b> <b>Incest:</b> copulating with a close relative.</p>                                                                                                                                                                                                                                                                                                                                                                                                                                                                                                                                                                                                                                                                                                                                                                                                                                                                                                                                                                                                                                                                                                                             |
| <b>Vigilance</b>              |                      | <p>The individual intentionally looks at some individuals from the other group.</p>                                                                                                                                                                                                                                                                                                                                                                                                                                                                                                                                                                                                                                                                                                                                                                                                                                                                                                                                                                                                                                                                                                                                                                                                                                                                                                                                                                                                                                                                                                         |

**Table S2. Results of the statistical models.** For each model and predictor, estimators, standard errors (SE), likelihood ratio tests (LRT), degrees of freedom (gl), and p-values (p). Models 4-6 and 8 are not included in this table because no significant differences were found between the full model and the null model.

| Model                                      | $\Delta$ AIC | p-value              | Anova Type III Analysis of Variance |       |        |    |                   |
|--------------------------------------------|--------------|----------------------|-------------------------------------|-------|--------|----|-------------------|
|                                            |              |                      | Estimate                            | SE    | LRT    | gl | p-value           |
| <b>Model 1: Abnormal</b>                   | <b>19.63</b> | <b>&lt; 0.001***</b> |                                     |       |        |    |                   |
| Intercept                                  |              |                      | 1.201                               | 0.266 | -      | -  | -                 |
| Sex (Male)                                 |              |                      | -0.009                              | 0.29  | 0.001  | 1  | 0.975             |
| Age (Senior)                               |              |                      | 0.364                               | 0.359 | 0.878  | 1  | 0.311             |
| Group (Mutamba)                            |              |                      | -0.591                              | 0.358 | 0.372  | 1  | 0.552             |
| Participation (Occasional)                 |              |                      | -0.642                              | 0.293 | 1.84   | 1  | 0.126             |
| Condition (Base)                           |              |                      | 0.209                               | 0.119 | 23.629 | 2  | <b>&lt; 0.001</b> |
| <b>Model 2: Self-directed</b>              | <b>6.9</b>   | <b>0.004**</b>       |                                     |       |        |    |                   |
| Intercept                                  |              |                      | 0.94                                | 0.131 | -      | -  | -                 |
| Sex (Male)                                 |              |                      | -0.032                              | 0.105 | 0.093  | 1  | 0.762             |
| Age (Senior)                               |              |                      | 0.258                               | 0.104 | 5.072  | 1  | <b>0.013</b>      |
| Group (Mutamba)                            |              |                      | -0.078                              | 0,1   | 0.577  | 1  | 0.437             |
| Participation (Occasional)                 |              |                      | 0.023                               | 0.099 | 0.052  | 1  | 0.819             |
| Condition (Base)                           |              |                      | -0.224                              | 0.082 | 10.934 | 2  | <b>0.006</b>      |
| <b>Model 3: Affiliation<br/>intragroup</b> | <b>21</b>    | <b>&lt; 0.001***</b> |                                     |       |        |    |                   |
| Intercept                                  |              |                      | 1.023                               | 0.118 | -      | -  | -                 |
| Sex (Male)                                 |              |                      | -0.171                              | 0.074 | 4.587  | 1  | <b>0.021</b>      |
| Age (Senior)                               |              |                      | 0.042                               | 0.071 | 0.348  | 1  | 0.555             |
| Group (Mutamba)                            |              |                      | 0.31                                | 0.076 | 11.359 | 1  | <b>&lt; 0.001</b> |
| Participation (Occasional)                 |              |                      | -0.199                              | 0.066 | 7.075  | 1  | <b>0.003</b>      |
| Condition (Base)                           |              |                      | -0.474                              | 0.103 | 25.024 | 2  | <b>&lt; 0.001</b> |
| <b>Model 7: Vigilance<br/>intragroup</b>   | <b>2.07</b>  | <b>0.048*</b>        |                                     |       |        |    |                   |
| Intercept                                  |              |                      | 0.284                               | 0.307 | -      | -  | -                 |
| Sex (Male)                                 |              |                      | -0.006                              | 0.159 | 0.002  | 1  | 0.97              |
| Age (Senior)                               |              |                      | 0.092                               | 0.184 | 0.252  | 1  | 0.616             |
| Group (Mutamba)                            |              |                      | 0.04                                | 0.185 | 0.046  | 1  | 0.830             |

|                            |        |       |       |   |       |
|----------------------------|--------|-------|-------|---|-------|
| Participation (Occasional) | 0.228  | 0.154 | 2.18  | 1 | 0.138 |
| Condition (Base)           | -0.247 | 0.218 | 6.068 | 2 | 0.256 |

**Table S3. Results of the Post-hoc analysis of the statistical models.** For each model and contrast, estimators, standard errors (SE), z-scores (z), and p-values (p) are shown. Models 4-6 and 8 are not included in this table because no significant differences were found between the full model and the null model.

| Model                                  | Contrast                | Estimate | SE    | z-score | p-value           |
|----------------------------------------|-------------------------|----------|-------|---------|-------------------|
| <b>Model 1: Abnormal</b>               | Affiliative - Agonistic | 0.142    | 0.132 | 1.071   | 0.532             |
|                                        | Affiliative - Base      | 0.514    | 0.119 | 4.318   | <b>&lt; 0.001</b> |
|                                        | Agonistic - Base        | 0.373    | 0.104 | 3.584   | <b>0.001</b>      |
| <b>Model 2: Self-directed</b>          | Affiliative - Agonistic | 0.071    | 0.098 | 0.718   | 0.753             |
|                                        | Affiliative - Base      | 0.223    | 0.082 | 2.727   | <b>0.018</b>      |
|                                        | Agonistic - Base        | 0.153    | 0.066 | 2.319   | <b>0.053</b>      |
| <b>Model 3: Affiliation intragroup</b> | Affiliative - Agonistic | 0.156    | 0.135 | 1.157   | 0.479             |
|                                        | Affiliative - Base      | 0.474    | 0.103 | 4.606   | <b>&lt; 0.001</b> |
|                                        | Agonistic - Base        | 0.318    | 0.103 | 3.081   | <b>0.006</b>      |
| <b>Model 7: Vigilance intragroup</b>   | Affiliative - Agonistic | -0.191   | 0.260 | -0.735  | 0.743             |
|                                        | Affiliative - Base      | 0.247    | 0.218 | 1.136   | 0.492             |
|                                        | Agonistic - Base        | 0.439    | 0.182 | 2.413   | <b>0.042</b>      |

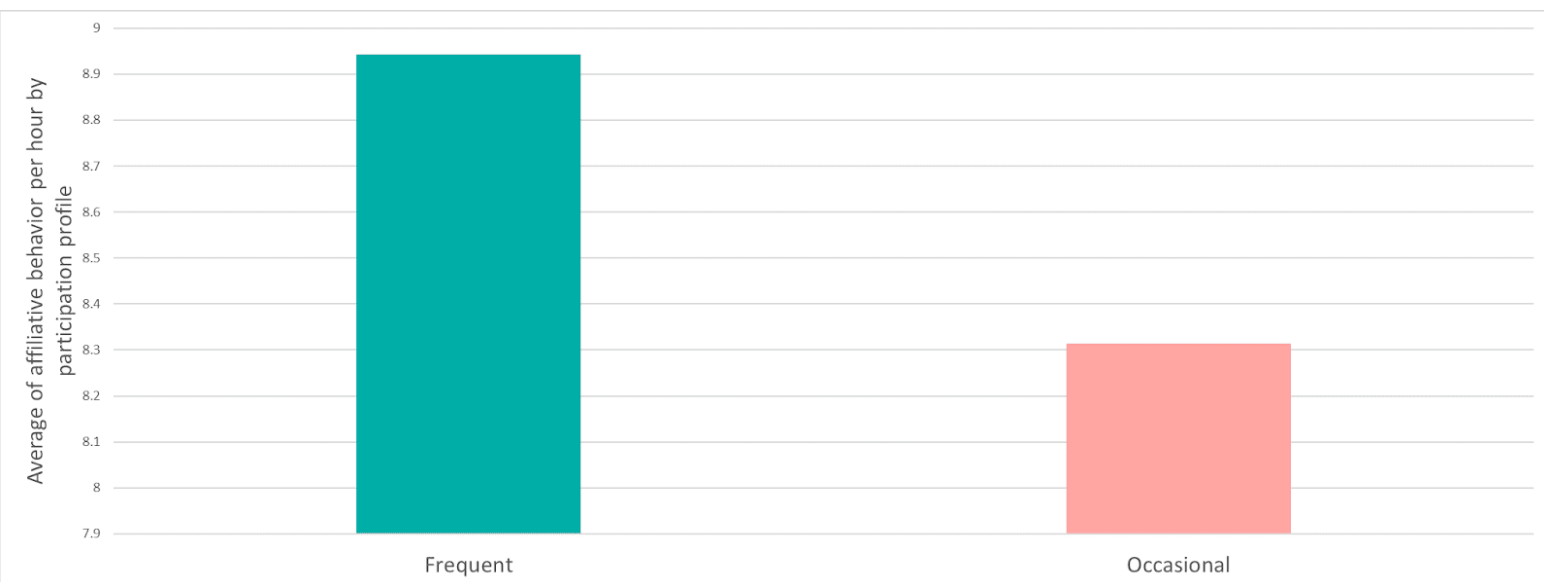

**Figure S1.** Rate of affiliative behavior according to intergroup participation profiles: frequent or occasional.

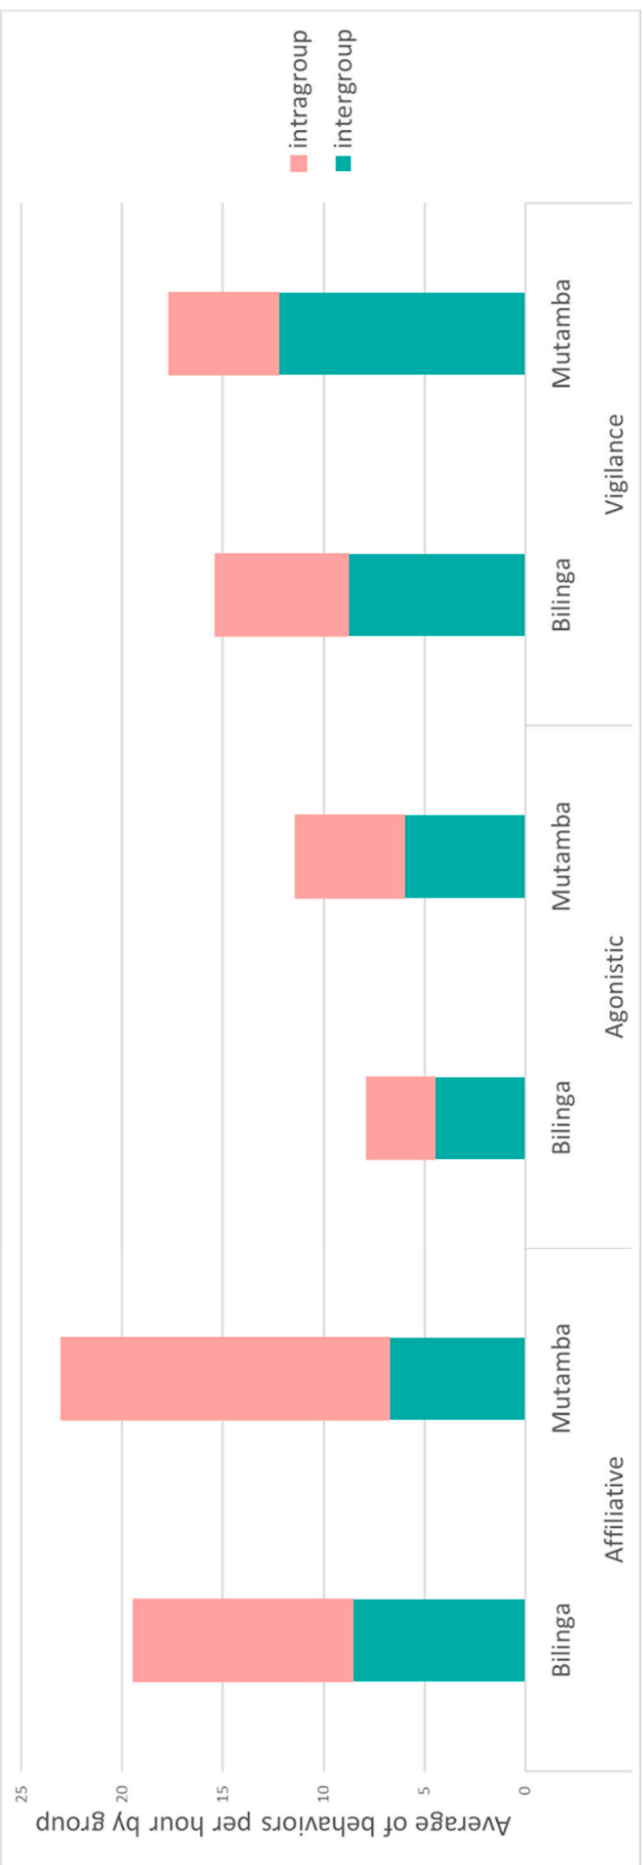

**Figure S2.** Graph showing the rates of affiliative, agonistic, and vigilance behaviors as a function of group (Mutamba or Bilinga) and type of interaction (intragroup or intergroup).
